# Supplementary material for: Metformin-Loaded Chitosan Hydrogels Suppress Bladder Tumor Growth in an Orthotopic Mouse Model via Intravesical Administration
Source: MDPI journal article supplement (doi:10.3390/molecules28186720), 2023-09-20
Supplement: s1 [file s1]

# Supplementary information

## **Metformin-Loaded Chitosan Hydrogels Suppress Bladder Tumour Growth in an Orthotopic Mouse Model via Intravesical Administration**

Xingjian Zhang<sup>1,†</sup>, Xin Hu<sup>1,†</sup>, Yijun Xie<sup>1</sup>, Lejing Xie<sup>1</sup>, Xiangyi Chen<sup>1</sup>, Mei Peng<sup>1</sup>, Duo Li<sup>1</sup>, Jun Deng<sup>1</sup>, Di Xiao<sup>1\*</sup> and Xiaoping Yang<sup>1,2\*</sup>

<sup>1</sup>Key Laboratory of Study and Discovery of Small Targeted Molecules of Hunan Province, Key Laboratory of Chemical Biology & Traditional Chinese Medicine Research of Ministry of Education, Department of Pharmacy, School of Medicine, Hunan Normal University, Changsha, Hunan, China.

<sup>2</sup>Key Laboratory of Protein Chemistry and Developmental Biology of Fish of Ministry of Education, Hunan Normal University, Changsha, Hunan, China.

† These authors contributed equally to this work.

\* Correspondence: dixiao@hunnu.edu.cn; (D.X.); xiaoping.yang@hunnu.edu.cn (X.Y.); Tel/Fax: 86-158-7406-6132(X.Y.).

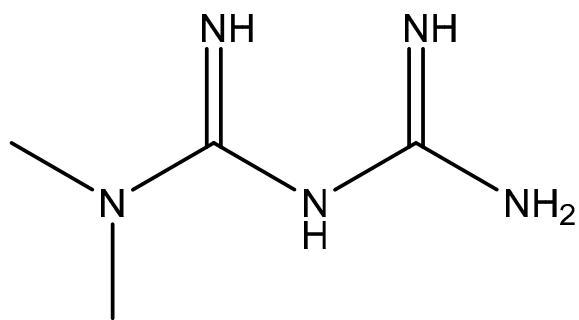

Figure S1. The structure of metformin.
